# Supplementary material for: Tumor Tissue Detection using Blood-Oxygen-Level-Dependent Functional MRI based on Independent Component Analysis
Source: PubMed Central journal article supplement (PMC5775317; doi:10.1038/s41598-017-18453-0), 2018-01-19
Supplement: 41598_2017_18453_MOESM1_ESM.pdf [file 41598_2017_18453_MOESM1_ESM.pdf]

## Supplementary Information

### **Tumor Tissue Detection using Blood-Oxygen-Level-Dependent Functional MRI based on Independent Component Analysis**

Huiyuan Huang<sup>1,2,3</sup>, Junfeng Lu<sup>4</sup>, Jinsong Wu<sup>4</sup>, Zhongxiang Ding<sup>5</sup>, Shuda Chen<sup>6</sup>,  
Lisha Duan<sup>7</sup>, Jianling Cui<sup>7</sup>, Fuyong Chen<sup>8</sup>, Dezhi Kang<sup>8</sup>, Le Qi<sup>9</sup>, Wusi Qiu<sup>10</sup>,  
Seong-Whan Lee<sup>11</sup>, ShiJun Qiu<sup>12</sup>, Dinggang Shen<sup>11,13\*</sup>, Yu-Feng Zang<sup>1,3</sup>, Han  
Zhang<sup>1,3,13\*</sup>

<sup>1</sup>Center for Cognition and Brain Disorders, Hangzhou Normal University, Hangzhou,  
Zhejiang 311121, China

<sup>2</sup>School of Psychology, South China Normal University, Guangzhou 510631, China

<sup>3</sup>Zhejiang Key Laboratory for Research in Assessment of Cognitive Impairments,  
Hangzhou, Zhejiang 310015, China

<sup>4</sup>Department of Neurosurgery, Huashan Hospital, Fudan University, Shanghai, 200040,  
China

<sup>5</sup>Department of Radiology, Zhejiang Provincial People's Hospital, Hangzhou,  
Zhejiang 310014, China

<sup>6</sup>Department of Neurosurgery, Zhejiang Provincial People's Hospital, Hangzhou,  
Zhejiang 310014, China

<sup>7</sup>Department of Radiology, the Third Hospital of Hebei Medical University,  
Shijiazhuang, Hebei 050051, China

<sup>8</sup>Department of Neurosurgery, No.1 Affiliated Hospital of Fujian Medical University,  
Fuzhou, Fujian 350000, China

<sup>9</sup>Department of Radiology, Affiliated Hospital of Hangzhou Normal University,  
Hangzhou, Zhejiang 310015, China

<sup>10</sup>Department of Neurosurgery, Affiliated Hospital of Hangzhou Normal University,  
Hangzhou, Zhejiang 310015, China

<sup>11</sup>Department of Brain and Cognitive Engineering, Korea University, Seoul 02841,  
Republic of Korea

<sup>12</sup>Medical Imaging Center, The First Affiliated Hospital of Guangzhou University of  
Chinese Medicine, Guangzhou, Guangdong, 510405 China

<sup>13</sup>Department of Radiology and BRIC, University of North Carolina at Chapel Hill,  
NC 27599, USA

\* Corresponding authors:

Han Zhang, Ph.D.

Emails: hanzhang@med.unc.edu; hanzhang@hznu.edu.cn

Tels: + 1(919) 808 8965; +86-571-28867717

Dinggang Shen, Ph.D.

Email: dgshen@med.unc.edu

Tel: +1(919) 843 5420

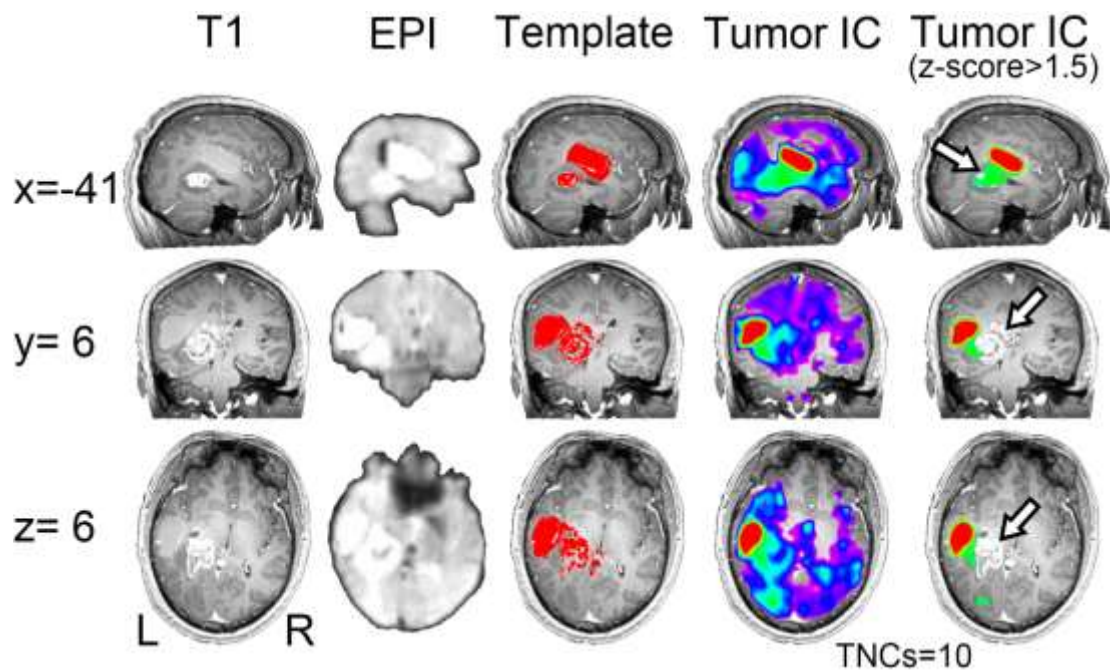

**Supplementary Figure S1. A case of glioma identification with a suboptimal result.** 3D-T1 image (1<sup>st</sup> column), mean EPI image (2<sup>nd</sup> column), initial tumor template (3<sup>rd</sup> column), and tumor-related components with and without threshold (the last two columns) are shown. TNCs here denotes the optimal total number of components as defined by our DICl algorithm; EPI: Echo Planar Imaging; Tumor IC: tumor-related independent component. Our method identified a part of the tumor region, but did not include the additional contrast-enhanced region (as indicated by arrows). However, if no threshold was applied, the contrast-enhanced region seems to connect with the other tumor area.

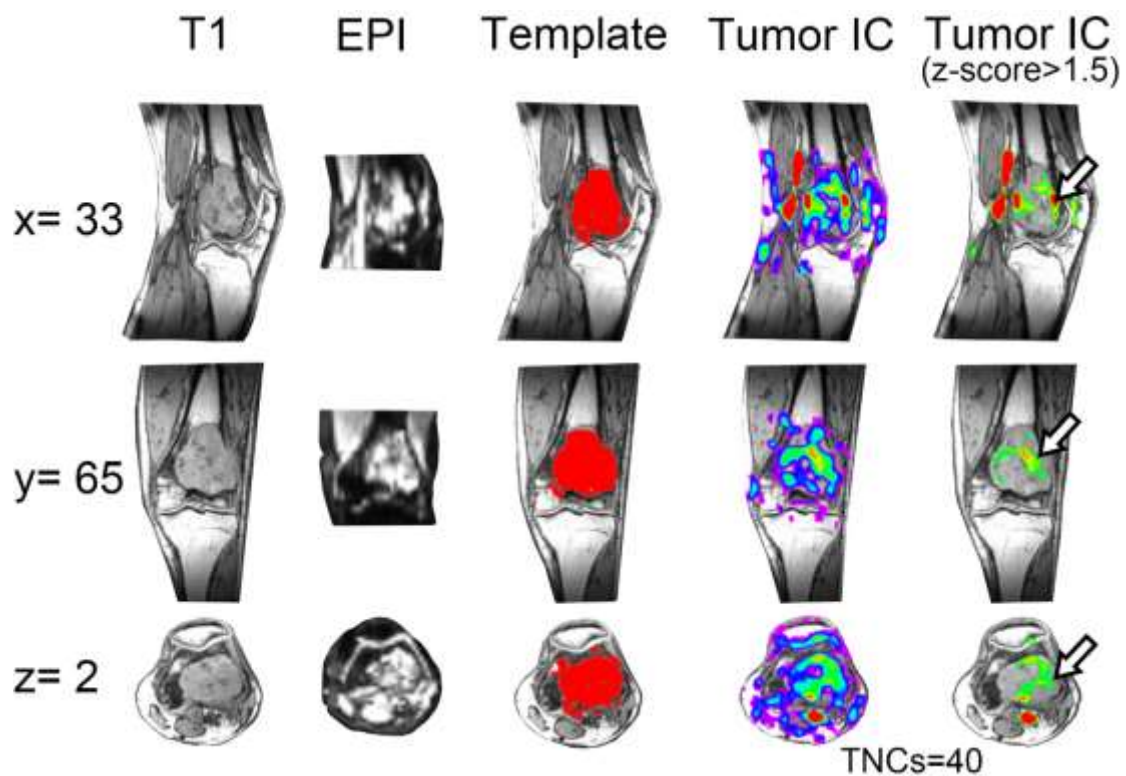

**Supplementary Figure S2. A case of non-brain musculoskeletal (MSK) tumor identification with a suboptimal result.** 3D-T1 image (1<sup>st</sup> column), mean EPI image (2<sup>nd</sup> column), initial tumor template (3<sup>rd</sup> column), and tumor-related components with and without threshold (the last two columns) were shown. TNCs here denotes the optimal total number of components as defined by our DIC1 algorithm; EPI: Echo Planar Imaging; Tumor IC: tumor-related independent component. Our method identified a part of the tumor region, but the other part of the tumor region was not identified (as indicated by arrows). The red colored areas in the “Template” column are roughly the whole tumor. Tumor IC has relatively weak signals compared with the peak region that could be outside of the tumor area.

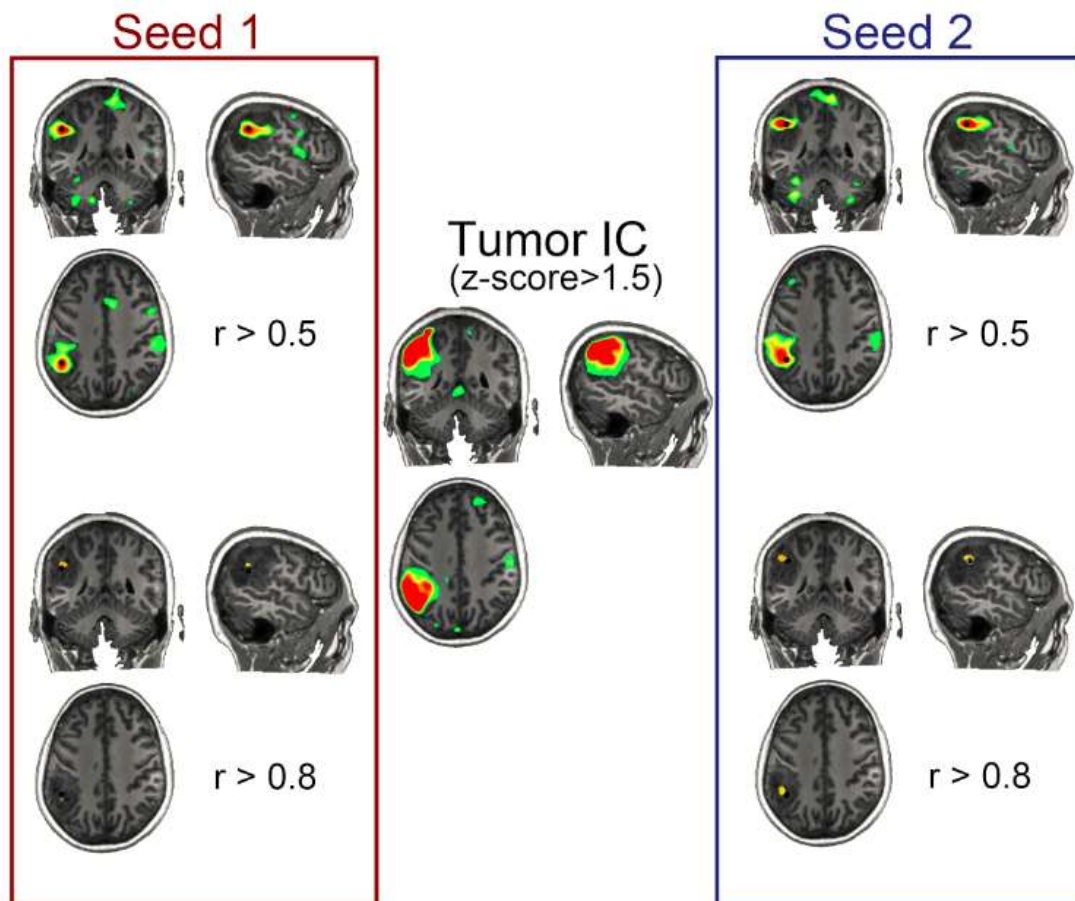

**Supplementary Figure S3. Representative case (P #2 from Center 1) showing the spatial map of the ICA-based tumor-related component (in the center) and those from the seed-based correlations using different seeds and different thresholds.** This patient had a glioma in the left parietal lobe. Seed 1 and Seed 2 represent the seed correlation-based results with each seed region placed at different voxels in the center of the tumor (as indicated by the black dots); Tumor IC: tumor-related component derived from ICA and identified by our DICI algorithm. Different thresholds (0.5 and 0.8) of the correlation maps were used to show the results.

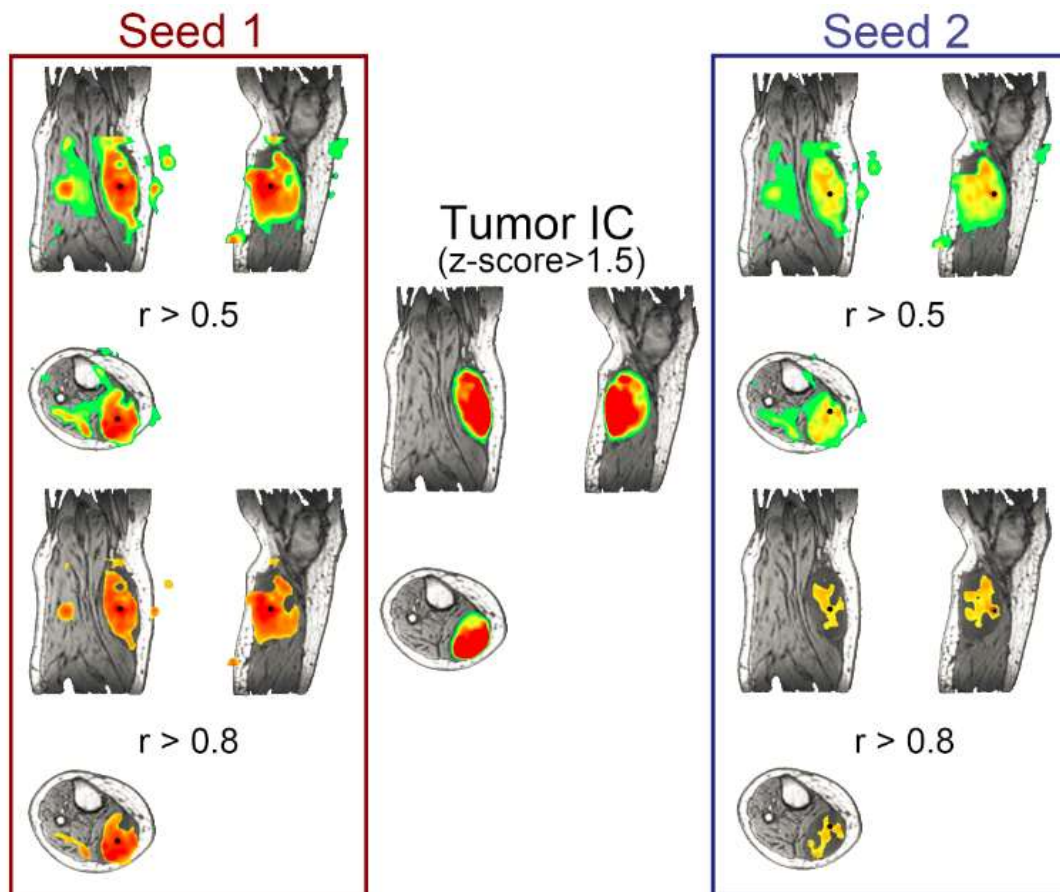

Supplementary Figure S4. Representative case (P #8 from Center 4) showing the spatial maps of the non-brain MSK tumor-related component derived from ICA on rs-fMRI and identified by DIC1 (Tumor IC) as well as those derived by seed-based correlations using two different seeds (Seed 1 and Seed 2) and different thresholds (0.5 and 0.8).

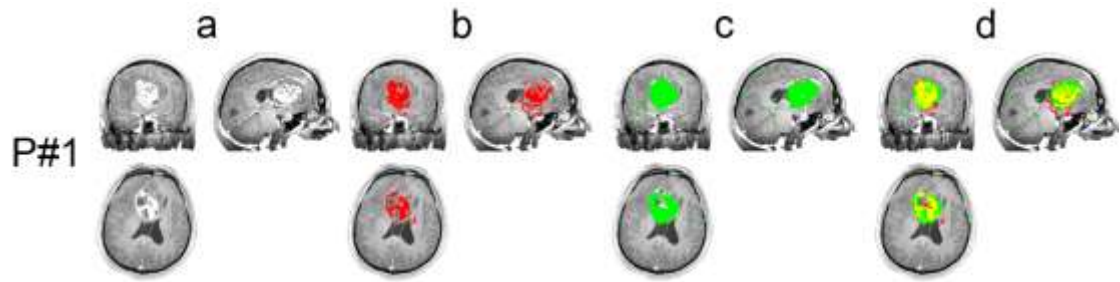

**Supplementary Figure S5. Comparison between T1-based and rs-fMRI-based tumor segmentation.** P #1 with high-grade glioma in the medial frontal area was randomly selected as an example. (a) Contrast-enhanced T1 image; (b) Tumor tissue (in red) delineated by using an intensity-based method based on the contrast-enhanced regions in (a); (c) Tumor-related component (in green) identified by using our method based on BOLD rs-fMRI data of this patient; (d) The overlap and differences between the two results in (b) and (c), where yellow color indicates the overlapping regions.



### Supplementary Table S1.

DICI report with IC label and DICI values for all TNCs settings (P #2 from Center 1).

| TNCs | IC label-1st | DICI value | IC label-2nd | DICI value | IC label-3rd | DICI value | IC label-4th | DICI value | 1st-2nd | 2nd-3rd | 3rd-4th |
|------|--------------|------------|--------------|------------|--------------|------------|--------------|------------|---------|---------|---------|
| 10   | 8            | 2.110      | 3            | 0.590      | 9            | 0.330      | 10           | 0.053      | 1.520   | 0.260   | 0.277   |
| 20   | 10           | 2.384      | 16           | 0.626      | 18           | 0.172      | 13           | -0.050     | 1.758   | 0.454   | 0.221   |
| 30   | 16           | 2.387      | 12           | 0.383      | 27           | 0.319      | 30           | 0.243      | 2.004   | 0.064   | 0.076   |
| 40   | 24           | 2.196      | 25           | 0.921      | 7            | 0.532      | 22           | 0.395      | 1.275   | 0.389   | 0.137   |
| 50   | 39           | 2.235      | 42           | 1.159      | 35           | 1.009      | 47           | 0.792      | 1.076   | 0.150   | 0.217   |
| 60   | 56           | 2.492      | 33           | 0.967      | 40           | 0.717      | 27           | 0.587      | 1.525   | 0.251   | 0.130   |
| 70   | 60           | 1.461      | 54           | 1.005      | 52           | 0.853      | 58           | 0.816      | 0.456   | 0.152   | 0.038   |
| 80   | 69           | 1.428      | 36           | 0.993      | 77           | 0.752      | 47           | 0.746      | 0.435   | 0.241   | 0.006   |
| 90   | 56           | 1.2612     | 51           | 1.185      | 70           | 0.781      | 41           | 0.684      | 0.076   | 0.404   | 0.097   |
| 100  | 83           | 1.334      | 51           | 1.211      | 53           | 1.033      | 87           | 0.988      | 0.124   | 0.178   | 0.045   |

DICI: Discriminability Index-based Component Identification; IC: independent component; TNCs: total number of components; 1st denotes the largest DICI value; 2nd denotes the second largest DICI value; 3rd denotes the third largest DICI value; 4th denotes the fourth largest DICI value; 1st -2nd denotes the difference between the largest DICI value and the second largest DICI value. The others are defined by this analogy. Grey shade indicates the best tumor-related component as suggested by the largest DICI value (shown in red) across multiple TNCs.

**Supplementary Table S2.**  
**Demographic and pathological information**  
**of the patients scanned in Center 1.**

| <b>Variables</b>       | <b>Values</b> |
|------------------------|---------------|
| <b>Cases</b>           | 8             |
| <b>Age (yrs)</b>       |               |
| Mean $\pm$ std         | 48 $\pm$ 16   |
| Range                  | 14-68         |
| <b>Males (females)</b> | 3 (5)         |
| <b>Pathology-no.</b>   |               |
| Oligodendroglioma      | 5             |
| Astrocytoma            | 1             |
| Glioblastoma           | 2             |



**Supplementary Table S3.**  
**Demographic and pathological information**  
**of the patients scanned in Center 2.**

| <b>Variables</b>       | <b>Values</b> |
|------------------------|---------------|
| <b>Cases</b>           | 4             |
| <b>Age (yrs)</b>       |               |
| Mean $\pm$ std         | 27 $\pm$ 10   |
| Range                  | 18-40         |
| <b>Males (females)</b> | 4 (0)         |
| <b>Pathology-no.</b>   |               |
| Astrocytoma            | 2             |
| N.A. <sup>a</sup>      | 2             |

<sup>a</sup> Suspected glioblastoma (WHO III-IV) based on T1 images (since they were not undergone craniotomy, their pathological information is not available).

**Supplementary Table S4.**  
**Demographic and pathological information**  
**of the patients scanned in Center 3<sup>a</sup>.**

| <b>Variables</b>       | <b>Values</b> |
|------------------------|---------------|
| <b>Cases</b>           | 20            |
| <b>Age (yrs)</b>       |               |
| Mean $\pm$ std         | 49 $\pm$ 17   |
| Range                  | 16-70         |
| <b>Males (females)</b> | 13 (7)        |
| <b>Pathology-no.</b>   |               |
| Glioblastoma           | 20            |

<sup>a</sup>Patients had glioblastomas (WHO IV), and they were randomly selected from a large database of Center 3.

**Supplementary Table S5.****Description of the scanner information and acquisition parameters used in each center.**

| <b>Center</b> | <b>Scanner<br/>(Field strength)</b>     | <b>RF coil type</b>                                                                          | <b>Echo Planar Imaging</b>                                                                                                                      | <b>3D T1 Imaging</b>                                                                                                      |
|---------------|-----------------------------------------|----------------------------------------------------------------------------------------------|-------------------------------------------------------------------------------------------------------------------------------------------------|---------------------------------------------------------------------------------------------------------------------------|
| Center 1      | GE<br>DISCOVERY<br>MR750<br>(3.0 T)     | 8-channel head coil                                                                          | TR/TE = 2000/30 ms<br>Flip angle = 90°<br>Slices # = 43<br>Thickness = 3.2 mm<br>FOV = 220 mm×220 mm<br>Matrix = 64×64<br>Scanning time = 8 min | TR/TE = 8.156/3.18 ms<br>Flip angle = 8°<br>Slices # = 176<br>Thickness = 1 mm<br>FOV = 256 mm×256 mm<br>Matrix = 256×256 |
| Center 2      | SIEMENS<br>Verio3.0<br>(3.0 T)          | 8-channel head coil                                                                          | TR/TE = 2000/30 ms<br>Flip angle = 90°<br>Slices # = 31<br>Thickness = 3 mm<br>FOV = 256 mm×256 mm<br>Matrix = 64×64<br>Scanning time = 8 min   | TR/TE = 2000/2.98 ms<br>Flip angle = 9°<br>Slices # = 176<br>Thickness = 1 mm<br>FOV = 256 mm×256 mm<br>Matrix = 256×223  |
| Center 3      | SIEMENS<br>MAGNETOM<br>Verio<br>(3.0 T) | 8-channel head coil                                                                          | TR/TE = 2000/35 ms<br>Flip angle = 90°<br>Slices # = 33<br>Thickness = 4 mm<br>FOV = 210 mm×210 mm<br>Matrix = 64×64<br>Scanning time = 8 min   | TR/TE = 1900/2.93 ms<br>Flip angle = 9°<br>Slices # = 176<br>Thickness = 1 mm<br>FOV = 256 mm×256 mm<br>Matrix = 256×215  |
| Center 4      | SIEMENS<br>Avanto<br>(1.5 T)            | 8-channel knee coil<br>8-channel body array<br>a large circularly polarized<br>flexible coil | TR/TE = 2000/40 ms<br>Flip angle = 90°<br>Slices # = 20<br>Thickness = 5 mm<br>FOV = 220 mm×220 mm<br>Matrix = 64×64<br>Scanning time = 6 min   | TR/TE = 1900/2.97 ms<br>Flip angle = 15°<br>Slices # = 176<br>Thickness = 1 mm<br>FOV = 220 mm×220 mm<br>Matrix = 256×246 |

TR: repetition time; TE: echo time; slices #: slices number; FOV: field of view; RF: Radio Frequency

**Supplementary Table S6.**  
**Demographic and clinical information of**  
**the MSK tumor patients scanned in Center 4<sup>a</sup>.**

| <b>Variables</b>       | <b>Values</b> |
|------------------------|---------------|
| <b>Cases</b>           | 28            |
| <b>Age (yrs)</b>       |               |
| Mean $\pm$ std         | 38 $\pm$ 19   |
| Range                  | 11-73         |
| <b>Males (females)</b> | 19 (9)        |
| <b>Position-no.</b>    |               |
| Femur                  | 12            |
| Tibia                  | 4             |
| Fibula                 | 2             |
| Humerus                | 1             |
| Calcaneus              | 1             |
| Pelma                  | 1             |
| Ilium                  | 1             |
| Soft tissue            | 6             |

<sup>a</sup> Patients had malignant musculoskeletal (MSK) tumors, and they were randomly selected from a large database of Center 4.

**Supplementary Table S7.**

**DICI report with IC label and DICI values for all TNCs settings (P #2 from Center 1 with  $z > 0.5$ ).**

| TNCs | IC label-1st | DICI value | IC label-2nd | DICI value | IC label-3rd | DICI value | IC label-4th | DICI value | 1st-2nd | 2nd-3rd | 3rd-4th |
|------|--------------|------------|--------------|------------|--------------|------------|--------------|------------|---------|---------|---------|
| 10   | 8            | 1.488      | 3            | 0.801      | 9            | 0.312      | 10           | 0.092      | 0.687   | 0.489   | 0.220   |
| 20   | 10           | 1.586      | 16           | 0.595      | 14           | 0.245      | 2            | 0.211      | 0.992   | 0.350   | 0.034   |
| 30   | 16           | 1.682      | 27           | 0.387      | 3            | 0.334      | 20           | 0.226      | 1.296   | 0.053   | 0.108   |
| 40   | 24           | 1.618      | 25           | 0.809      | 31           | 0.518      | 35           | 0.412      | 0.809   | 0.291   | 0.106   |
| 50   | 39           | 1.599      | 42           | 0.982      | 35           | 0.850      | 36           | 0.670      | 0.617   | 0.133   | 0.180   |
| 60   | 56           | 1.905      | 33           | 0.749      | 40           | 0.556      | 19           | 0.496      | 1.156   | 0.193   | 0.060   |
| 70   | 60           | 1.257      | 54           | 0.847      | 58           | 0.710      | 43           | 0.704      | 0.411   | 0.137   | 0.006   |
| 80   | 69           | 1.261      | 36           | 0.915      | 77           | 0.716      | 61           | 0.658      | 0.346   | 0.200   | 0.058   |
| 90   | 56           | 1.011      | 51           | 1.007      | 70           | 0.691      | 54           | 0.504      | 0.004   | 0.316   | 0.187   |
| 100  | 83           | 1.182      | 51           | 1.006      | 53           | 0.762      | 87           | 0.723      | 0.176   | 0.244   | 0.039   |

DICI: Discriminability Index-based Component Identification; IC: independent component; TNCs: total number of components; 1st denotes the largest DICI value; 2nd denotes the second largest DICI value; 3rd denotes the third largest DICI value; 4th denotes the fourth largest DICI value; 1st -2nd denotes the difference between the largest DICI value and the second largest DICI value. The others are defined by this analogy. Grey shade indicates the best tumor-related component as suggested by the largest DICI value (shown in red) across multiple TNCs.

### Supplementary Table S8.

DICI report with IC label and DICI values for all TNCs settings (P #2 from Center 1 with  $z > 1.5$ ).

| TNCs | IC label-1st | DICI value | IC label-2nd | DICI value | IC label-3rd | DICI value | IC label-4th | DICI value | 1st-2nd | 2nd-3rd | 3rd-4th |
|------|--------------|------------|--------------|------------|--------------|------------|--------------|------------|---------|---------|---------|
| 10   | 8            | 2.446      | 9            | 0.409      | 3            | 0.150      | 5            | 0.073      | 2.037   | 0.259   | 0.077   |
| 20   | 10           | 2.902      | 16           | 0.555      | 18           | 0.274      | 11           | -0.082     | 2.347   | 0.281   | 0.357   |
| 30   | 16           | 2.958      | 12           | 0.535      | 30           | 0.494      | 20           | 0.171      | 2.423   | 0.041   | 0.323   |
| 40   | 24           | 2.609      | 25           | 0.942      | 7            | 0.663      | 35           | 0.435      | 1.667   | 0.279   | 0.228   |
| 50   | 39           | 2.747      | 42           | 1.175      | 35           | 1.030      | 47           | 0.850      | 1.572   | 0.145   | 0.181   |
| 60   | 56           | 2.963      | 33           | 1.042      | 40           | 0.767      | 36           | 0.746      | 1.921   | 0.276   | 0.021   |
| 70   | 60           | 1.710      | 54           | 1.115      | 52           | 0.906      | 43           | 0.884      | 0.595   | 0.209   | 0.022   |
| 80   | 69           | 1.769      | 36           | 1.065      | 77           | 0.992      | 46           | 0.903      | 0.704   | 0.073   | 0.089   |
| 90   | 56           | 1.590      | 51           | 1.328      | 70           | 0.873      | 41           | 0.734      | 0.262   | 0.455   | 0.139   |
| 100  | 83           | 1.520      | 53           | 1.457      | 51           | 1.368      | 87           | 1.310      | 0.062   | 0.090   | 0.057   |

DICI: Discriminability Index-based Component Identification; IC: independent component; TNCs: total number of components; 1st denotes the largest DICI value; 2nd denotes the second largest DICI value; 3rd denotes the third largest DICI value; 4th denotes the fourth largest DICI value; 1st -2nd denotes the difference between the largest DICI value and the second largest DICI value. The others are defined by this analogy. Grey shade indicates the best tumor-related component as suggested by the largest DICI value (shown in red) across multiple TNCs.

### Supplementary Table S9.

DICI report with IC label and DICI values for all TNCs settings (P #2 from Center 1 with  $z > 2$ ).

| TNCs | IC label-1st | DICI value | IC label-2nd | DICI value | IC label-3rd | DICI value | IC label-4th | DICI value | 1st-2nd | 2nd-3rd | 3rd-4th |
|------|--------------|------------|--------------|------------|--------------|------------|--------------|------------|---------|---------|---------|
| 10   | 8            | 2.139      | 9            | 0.459      | 5            | 0.143      | 2            | -0.359     | 1.680   | 0.316   | 0.000   |
| 20   | 10           | 2.935      | 16           | 0.359      | 18           | 0.335      | 13           | -0.248     | 2.576   | 0.024   | 0.000   |
| 30   | 16           | 3.090      | 12           | 0.610      | 30           | 0.089      | 19           | -0.143     | 2.480   | 0.521   | 0.000   |
| 40   | 24           | 2.741      | 25           | 0.876      | 7            | 0.726      | 39           | 0.230      | 1.865   | 0.150   | 0.000   |
| 50   | 39           | 2.774      | 42           | 1.139      | 35           | 0.958      | 6            | 0.765      | 1.635   | 0.181   | 0.000   |
| 60   | 56           | 3.117      | 33           | 0.918      | 36           | 0.853      | 27           | 0.784      | 2.198   | 0.065   | 0.000   |
| 70   | 60           | 1.918      | 54           | 1.047      | 58           | 0.987      | 43           | 0.928      | 0.871   | 0.060   | 0.000   |
| 80   | 69           | 1.998      | 46           | 1.256      | 77           | 1.152      | 36           | 1.121      | 0.742   | 0.104   | 0.000   |
| 90   | 56           | 1.875      | 51           | 1.378      | 70           | 0.987      | 27           | 0.729      | 0.496   | 0.392   | 0.000   |
| 100  | 83           | 1.827      | 53           | 1.821      | 87           | 1.460      | 51           | 1.422      | 0.007   | 0.361   | 0.000   |

DICI: Discriminability Index-based Component Identification; IC: independent component; TNCs: total number of components; 1st denotes the largest DICI value; 2nd denotes the second largest DICI value; 3rd denotes the third largest DICI value; 4th denotes the fourth largest DICI value; 1st-2nd denotes the difference between the largest DICI value and the second largest DICI value. The others are defined by this analogy. Grey shade indicates the best tumor-related component as suggested by the largest DICI value (shown in red) across multiple TNCs.



### Supplementary Table S10.

DICI report with IC label and DICI values for all TNCs settings (P #2 from Center 1 with  $z > 2.5$ ).

| TNCs | IC label-1st | DICI value | IC label-2nd | DICI value | IC label-3rd | DICI value | IC label-4th | DICI value | 1st-2nd | 2nd-3rd | 3rd-4th |
|------|--------------|------------|--------------|------------|--------------|------------|--------------|------------|---------|---------|---------|
| 10   | 9            | 0.310      | 5            | 0.119      | 2            | -0.363     | 1            | Inf        | 0.191   | 0.482   | Inf     |
| 20   | 10           | 2.820      | 18           | 0.395      | 16           | 0.393      | 13           | -0.236     | 2.424   | 0.002   | 0.630   |
| 30   | 16           | 2.756      | 12           | 0.656      | 19           | -0.136     | 29           | -0.505     | 2.099   | 0.793   | 0.369   |
| 40   | 24           | 2.782      | 25           | 0.823      | 7            | 0.796      | 39           | 0.389      | 1.959   | 0.027   | 0.406   |
| 50   | 39           | 2.829      | 42           | 1.017      | 35           | 0.908      | 6            | 0.825      | 0.812   | 0.109   | 0.083   |
| 60   | 56           | 2.837      | 36           | 0.927      | 27           | 0.821      | 33           | 0.806      | 1.910   | 0.106   | 0.015   |
| 70   | 60           | 1.929      | 58           | 1.182      | 54           | 0.960      | 43           | 0.837      | 0.747   | 0.222   | 0.123   |
| 80   | 46           | NaN        | 69           | 2.101      | 77           | 1.220      | 61           | 1.191      | NaN     | 0.882   | 0.028   |
| 90   | 56           | 1.935      | 51           | 1.476      | 70           | 1.111      | 49           | 0.750      | 0.460   | 0.365   | 0.361   |
| 100  | 53           | 1.991      | 83           | 1.792      | 87           | 1.522      | 51           | 1.511      | 0.199   | 0.270   | 0.010   |

DICI: Discriminability Index-based Component Identification; IC: independent component; TNCs: total number of components; 1st denotes the largest DICI value; 2nd denotes the second largest DICI value; 3rd denotes the third largest DICI value; 4th denotes the fourth largest DICI value; 1st -2nd denotes the difference between the largest DICI value and the second largest DICI value. The others are defined by this analogy. Grey shade indicates the best tumor-related component as suggested by the largest DICI value (shown in red) across multiple TNCs. NaN means there was no voxels survived after applying the threshold.

### Supplementary Table S11.

DICI report with IC label and DICI values for all TNCs settings (P #2 from Center 1 with  $z > 3$ ).

| TNCs | IC label-1st | DICI value | IC label-2nd | DICI value | IC label-3rd | DICI value | IC label-4th | DICI value | 1st-2nd | 2nd-3rd | 3rd-4th |
|------|--------------|------------|--------------|------------|--------------|------------|--------------|------------|---------|---------|---------|
| 10   | 3            | NaN        | 8            | NaN        | 5            | 0.162      | 9            | 0.014      | NaN     | NaN     | 0.148   |
| 20   | 10           | NaN        | 18           | 0.390      | 13           | -0.180     | 9            | -0.452     | NaN     | 0.571   | 0.272   |
| 30   | 16           | NaN        | 12           | 0.765      | 19           | -0.213     | 29           | -0.561     | NaN     | 0.978   | 0.349   |
| 40   | 24           | NaN        | 7            | 0.795      | 25           | 0.703      | 39           | 0.450      | NaN     | 0.092   | 0.253   |
| 50   | 39           | NaN        | 42           | 0.933      | 35           | 0.861      | 6            | 0.848      | NaN     | 0.071   | 0.013   |
| 60   | 56           | 2.636      | 36           | 0.932      | 27           | 0.787      | 33           | 0.612      | 1.704   | 0.145   | 0.175   |
| 70   | 60           | 1.998      | 58           | 1.377      | 54           | 0.876      | 51           | 0.792      | 0.621   | 0.501   | 0.084   |
| 80   | 46           | NaN        | 49           | NaN        | 69           | 2.081      | 61           | 1.310      | NaN     | NaN     | 0.771   |
| 90   | 56           | 1.963      | 51           | 1.407      | 70           | 1.135      | 27           | 0.736      | 0.556   | 0.272   | 0.399   |
| 100  | 53           | 2.045      | 83           | 1.796      | 87           | 1.512      | 51           | 1.449      | 0.249   | 0.285   | 0.063   |

DICI: Discriminability Index-based Component Identification; IC: independent component; TNCs: total number of components; 1st denotes the largest DICI value; 2nd denotes the second largest DICI value; 3rd denotes the third largest DICI value; 4th denotes the fourth largest DICI value; 1st -2nd denotes the difference between the largest DICI value and the second largest DICI value. The others are defined by this analogy. Grey shade indicates the best tumor-related component as suggested by the largest DICI value (shown in red) across multiple TNCs. NaN means there was no voxels survived after applying the threshold.
